# Supplementary material for: The effect of salinity on the biogeochemistry of the coccolithophores with implications for coccolith-based isotopic proxies
Source: Copernicus journal article supplement (doi:10.5194/bg-15-6761-2018), 2018-11-14
Supplement: Supplementary file 1 [file bg-15-6761-2018-supplement.pdf]

Supplement of Biogeosciences, 15, 6761–6772, 2018  
<https://doi.org/10.5194/bg-15-6761-2018-supplement>  
© Author(s) 2018. This work is distributed under  
the Creative Commons Attribution 4.0 License.

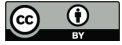

*Supplement of*

## **The effect of salinity on the biogeochemistry of the coccolithophores with implications for coccolith-based isotopic proxies**

**Michaël Hermoso and Marceau Lecasble**

*Correspondence to:* Michaël Hermoso ([michael.hermoso@sorbonne-universite.fr](mailto:michael.hermoso@sorbonne-universite.fr))

The copyright of individual parts of the supplement might differ from the CC BY 4.0 License.

| Specific division rates vs salinity (Fig. 2)    |                     | Linear fit |          | Second-order polynomial fit |           |
|-------------------------------------------------|---------------------|------------|----------|-----------------------------|-----------|
|                                                 |                     | $r^2$      | p-value  | $r^2$                       | p-value   |
| RCC1314                                         | <i>G. oceanica</i>  | 0.84       | 0.0002   | 0.93                        | 8.09E-06  |
| RCC4032                                         | <i>G. ericsonii</i> | 0.0018     | 0.90548  | 0.45                        | 0.0036141 |
| RCC1212                                         | <i>E. huxleyi</i> B | 0.39       | 0.029963 | 0.87                        | 8.09E-06  |
| RCC1256                                         | <i>E. huxleyi</i> A | 0.002      | 0.87619  | 0.91                        | 8.09E-06  |
| Cell size vs salinity (Fig. 3)                  |                     | Linear fit |          | Second-order polynomial fit |           |
|                                                 |                     | $r^2$      | p-value  | $r^2$                       | p-value   |
| RCC1314                                         | <i>G. oceanica</i>  | 0.8054     | 0.00043  | 0.86                        | 0.00011   |
| RCC4032                                         | <i>G. ericsonii</i> | 0.82254    | 0.00029  | 0.95                        | 0.01105   |
| RCC1212                                         | <i>E. huxleyi</i> B | 0.026086   | 0.61603  | 0.03                        | 0.00011   |
| RCC1256                                         | <i>E. huxleyi</i> A | 0.1565     | 0.20305  | 0.81                        | 0.00011   |
| Oxygen isotope composition vs salinity (Fig. 5) |                     | Linear fit |          | Second-order polynomial fit |           |
|                                                 |                     | $r^2$      | p-value  | $r^2$                       | p-value   |
| RCC1314                                         | <i>G. oceanica</i>  | 0.14324    | 0.28084  | 0.57                        | 0.01153   |
| RCC4032                                         | <i>G. ericsonii</i> | 0.51126    | 0.03037  | 0.53                        | 0.06904   |
| RCC1212                                         | <i>E. huxleyi</i> B | 3.55E-05   | 0.98613  | 0.32                        | 0.01349   |
| RCC1256                                         | <i>E. huxleyi</i> A | 0.0006052  | 0.94991  | 0.006                       | 0.01153   |
| Carbon isotope composition vs salinity (Fig.6)  |                     | Linear fit |          | Second-order polynomial fit |           |
|                                                 |                     | $r^2$      | p-value  | $r^2$                       | p-value   |
| RCC1314                                         | <i>G. oceanica</i>  | 0.32566    | 0.08492  | 0.68                        | 0.00343   |
| RCC4032                                         | <i>G. ericsonii</i> | 0.025911   | 0.67908  | 0.91                        | 0.07549   |
| RCC1212                                         | <i>E. huxleyi</i> B | 0.65176    | 0.00150  | 0.72                        | 0.00343   |
| RCC1256                                         | <i>E. huxleyi</i> A | 0.1212     | 0.32423  | 0.12                        | 0.00343   |

**Table S1:** Goodness of fit of the regression between the various measured parameters and salinity.
